# Supplementary material
Source: PubMed Central journal article supplement (PMC3056077)

## Legends for Supplemental Figures

**Supplemental figure 1. EPA and DHA reduce the TGF- $\beta$ 1-induced Smad-responsive promoter activity.** (A) Left ventricular mRNA expression of PAI-1 analyzed by real-time PCR 3 days and 7 days after TAC. Data are presented as mean  $\pm$  SEM (n=5 per group). Data were analyzed by two-way ANOVA with Tukey's post-hoc test. (B) Cardiac fibroblasts were transfected with VSV-g pseudotyped lentivirus particles expressing the firefly luciferase gene under the control of a CMV promoter and tandem repeats of the Smad transcriptional response element (TRE). TGF- $\beta$ 1 (1 ng/ml) increased the luciferase activity in transfected cardiac fibroblasts; 24hrs pretreatment of DHA and EPA reduced TGF- $\beta$ 1-induced increase of luciferase activity. Data are presented as mean  $\pm$  SEM (n=5-6 per group). Data were analyzed by one-way ANOVA with Tukey's post-hoc test.

**Supplemental Figure 2. Proposed anti-fibrotic mechanism of  $\omega$ -3 PUFAs in cardiac fibroblast.**

**Supplemental Figure 3. EPA and DHA do not block TGF- $\beta$ 1-induced activation of ERK1/2.** (A) Phosphorylated ERK1/2 (Thr202/Tyr204) and total ERK1/2 were detected by Western blot in cultured cardiac fibroblasts treated for 24 hr with EPA or DHA (10  $\mu$ M) and for an additional 1hr of TGF- $\beta$ 1 (1 ng/ml) with fatty acids. (B) Quantification of Phosphorylated ERK1/2 relative to total ERK1/2. Data are presented as mean  $\pm$  SEM (n=5 per group). Data were analyzed by one-way ANOVA with Tukey's post-hoc test.

**Supplemental Table 1: Fatty acid profiles from red blood cells<sup>a</sup>.**

| Fatty acid <sup>b</sup>          | Structure | Control diet  |                          | Fish oil diet              |                            |
|----------------------------------|-----------|---------------|--------------------------|----------------------------|----------------------------|
|                                  |           | Sham (n=6)    | TAC (n=9)                | Sham (n=6)                 | TAC (n=9)                  |
| Myristic acid                    | C14:0     | 0.26 ± 0.03   | 0.25 ± 0.01              | 0.31 ± 0.01 <sup>A</sup>   | 0.29 ± 0.01 <sup>C</sup>   |
| Palmitic acid                    | C16:0     | 29.3 ± 0.20   | 29.7 ± 0.27              | 31.6 ± 0.44 <sup>A</sup>   | 32.4 ± 0.28 <sup>C</sup>   |
| Palmitoleic acid                 | C16:1n7   | 0.83 ± 0.08   | 0.84 ± 0.06              | 0.79 ± 0.04                | 0.79 ± 0.03                |
| <i>trans</i> Palmitoleic acid    | C16:1n7t  | 0.05 ± 0.00   | 0.06 ± 0.00              | 0.07 ± 0.01 <sup>A</sup>   | 0.08 ± 0.00 <sup>C</sup>   |
| Stearic acid                     | C18:0     | 12.8 ± 0.43   | 13.3 ± 0.24              | 12.4 ± 0.10                | 11.5 ± 0.13 <sup>B,C</sup> |
| Oleic acid                       | C18:1n9   | 14.1 ± 0.40   | 15.3 ± 0.34 <sup>A</sup> | 13.3 ± 0.10                | 13.7 ± 0.14 <sup>C</sup>   |
| <i>trans</i> Oleic acid          | C18:1t    | 0.19 ± 0.02   | 0.17 ± 0.01              | 0.18 ± 0.02                | 0.15 ± 0.01                |
| Linoleic acid (n-6)              | C18:2n6   | 11.1 ± 0.53   | 10.5 ± 0.34              | 10.2 ± 0.12                | 10.3 ± 0.16                |
| <i>trans</i> Linoleic acid (n-6) | C18:2n6t  | 0.24 ± 0.02   | 0.28 ± 0.02              | 0.32 ± 0.04                | 0.17 ± 0.02 <sup>B,C</sup> |
| $\alpha$ -Linolenic acid (n-3)   | C18:3n3   | 0.05 ± 0.01   | 0.05 ± 0.00              | 0.04 ± 0.01 <sup>A</sup>   | 0.03 ± 0.00 <sup>C</sup>   |
| $\gamma$ -Linolenic acid (n-6)   | C18:3n6   | 0.08 ± 0.01   | 0.09 ± 0.00              | 0.10 ± 0.01                | 0.13 ± 0.01 <sup>B,C</sup> |
| Eicosenoic acid                  | C20:1n9   | 0.48 ± 0.01   | 0.52 ± 0.01              | 0.45 ± 0.02                | 0.38 ± 0.01 <sup>B,C</sup> |
| Eicosadienoic acid (n-6)         | C20:2n6   | 0.30 ± 0.02   | 0.28 ± 0.01              | 0.20 ± 0.01 <sup>A</sup>   | 0.18 ± 0.00 <sup>C</sup>   |
| Eicosatrienoic acid (n-6)        | C20:3n6   | 1.26 ± 0.08   | 1.37 ± 0.04              | 1.13 ± 0.05                | 1.06 ± 0.02 <sup>C</sup>   |
| Arachidonic acid (AA, n-6)       | C20:4n6   | 19.3 ± 0.63   | 18.4 ± 0.34              | 10.6 ± 0.29 <sup>A</sup>   | 10.4 ± 0.14 <sup>C</sup>   |
| Eicosapentaenoic acid (EPA, n-3) | C20:5n3   | 0.05 ± 0.01   | 0.08 ± 0.04              | 3.59 ± 0.14 <sup>A</sup>   | 3.64 ± 0.11 <sup>C</sup>   |
| Docosatetraenoic acid (n-6)      | C22:4n6   | 2.17 ± 0.10   | 2.26 ± 0.06              | 0.51 ± 0.00 <sup>A</sup>   | 0.50 ± 0.01 <sup>C</sup>   |
| Docosapentaenoic acid (n-3)      | C22:5n3   | 0.42 ± 0.06   | 0.26 ± 0.02 <sup>A</sup> | 2.16 ± 0.02 <sup>A</sup>   | 2.14 ± 0.03 <sup>C</sup>   |
| Docosapentaenoic acid (n-6)      | C22:5n6   | 2.17 ± 0.24   | 2.61 ± 0.06 <sup>A</sup> | 0.24 ± 0.01 <sup>A</sup>   | 0.28 ± 0.00 <sup>C</sup>   |
| Docosahexaenoic acid (DHA, n-3)  | C22:6n3   | 4.41 ± 0.22   | 3.45 ± 0.11 <sup>A</sup> | 11.5 ± 0.09 <sup>A</sup>   | 11.6 ± 0.11 <sup>C</sup>   |
| Lignoceric acid                  | C24:0     | 0.17 ± 0.01   | 0.16 ± 0.01              | 0.18 ± 0.01                | 0.22 ± 0.01 <sup>B,C</sup> |
| Nervonic acid                    | C24:1n9   | 0.15 ± 0.01   | 0.12 ± 0.01              | 0.15 ± 0.02                | 0.17 ± 0.01 <sup>C</sup>   |
| <b>Composite Indices</b>         |           |               |                          |                            |                            |
| Omega-3 Content (DHA+EPA)        |           | 4.45 ± 0.23   | 3.54 ± 0.13 <sup>A</sup> | 15.1 ± 0.11 <sup>A</sup>   | 15.2 ± 0.17 <sup>C</sup>   |
| Total Saturated                  |           | 42.6 ± 0.42   | 43.4 ± 0.40              | 44.5 ± 0.40 <sup>A</sup>   | 44.3 ± 0.29                |
| Total Monounsaturated            |           | 15.8 ± 0.43   | 17.0 ± 0.40 <sup>A</sup> | 15.0 ± 0.14                | 15.3 ± 0.14 <sup>C</sup>   |
| n-3 Polyunsaturated              |           | 4.93 ± 0.29   | 3.84 ± 0.15 <sup>A</sup> | 17.3 ± 0.11 <sup>A</sup>   | 17.4 ± 0.19 <sup>C</sup>   |
| n-6 Polyunsaturated              |           | 36.7 ± 0.64   | 35.7 ± 0.36              | 23.2 ± 0.31 <sup>A</sup>   | 23.0 ± 0.26 <sup>C</sup>   |
| n-3 : n-6                        |           | 0.135 ± 0.008 | 0.108 ± 0.005            | 0.745 ± 0.011 <sup>A</sup> | 0.756 ± 0.011 <sup>C</sup> |
| EPA : AA                         |           | 0.003 ± 0.001 | 0.004 ± 0.002            | 0.342 ± 0.021 <sup>A</sup> | 0.350 ± 0.011 <sup>C</sup> |
| EPA : DHA                        |           | 0.010 ± 0.002 | 0.022 ± 0.009            | 0.313 ± 0.014 <sup>A</sup> | 0.314 ± 0.009 <sup>C</sup> |

<sup>A</sup>  $P < 0.05$  versus Control diet/sham; <sup>B</sup>  $P < 0.05$  versus Fish oil diet/sham; <sup>C</sup>  $P < 0.05$  versus Control diet/TAC. All measurements are means ± SEM, and significance was determined using the two-way ANOVA with post tukey test.

<sup>a</sup> Reported as percent of total fatty acid.

<sup>b</sup> Most common name given. Omega-9, omega-6 and omega-3 FAs are indicated as n9, n6, and n3, respectively

**Supplemental Table 2: Fatty acid profiles from LV tissue<sup>a</sup>.**

| Fatty acid <sup>b</sup>          | Structure | Control diet  |                          | Fish oil diet              |                              |
|----------------------------------|-----------|---------------|--------------------------|----------------------------|------------------------------|
|                                  |           | Sham (n=6)    | TAC (n=9)                | Sham (n=6)                 | TAC (n=9)                    |
| Myristic acid                    | C14:0     | 0.23 ± 0.02   | 0.23 ± 0.01              | 0.31 ± 0.02 <sup>A</sup>   | 0.30 ± 0.03 <sup>C</sup>     |
| Palmitic acid                    | C16:0     | 13.5 ± 0.21   | 13.7 ± 0.10              | 15.0 ± 0.26 <sup>A</sup>   | 14.9 ± 0.20 <sup>C</sup>     |
| Palmitoleic acid                 | C16:1n7   | 0.50 ± 0.07   | 0.56 ± 0.04              | 0.65 ± 0.07                | 0.66 ± 0.06                  |
| <i>trans</i> Palmitoleic acid    | C16:1n7t  | 0.03 ± 0.00   | 0.03 ± 0.00              | 0.037 ± 0.002 <sup>A</sup> | 0.044 ± 0.001 <sup>B,C</sup> |
| Stearic acid                     | C18:0     | 16.6 ± 0.39   | 17.0 ± 0.15              | 16.0 ± 0.27                | 16.2 ± 0.25 <sup>C</sup>     |
| Oleic acid                       | C18:1n9   | 12.2 ± 0.76   | 12.9 ± 0.47              | 9.99 ± 0.46 <sup>A</sup>   | 10.6 ± 0.35 <sup>C</sup>     |
| <i>trans</i> Oleic acid          | C18:1t    | 0.17 ± 0.01   | 0.16 ± 0.00              | 0.15 ± 0.00 <sup>A</sup>   | 0.14 ± 0.00 <sup>C</sup>     |
| Linoleic acid (n-6)              | C18:2n6   | 17.4 ± 0.51   | 16.6 ± 0.33              | 11.7 ± 0.14 <sup>A</sup>   | 12.4 ± 0.45 <sup>C</sup>     |
| <i>trans</i> Linoleic acid (n-6) | C18:2n6t  | 0.07 ± 0.00   | 0.07 ± 0.00              | 0.06 ± 0.00                | 0.07 ± 0.00                  |
| $\alpha$ -Linolenic acid (n-3)   | C18:3n3   | 0.04 ± 0.00   | 0.04 ± 0.00              | 0.03 ± 0.00                | 0.04 ± 0.00                  |
| $\gamma$ -Linolenic acid (n-6)   | C18:3n6   | 0.04 ± 0.00   | 0.04 ± 0.00              | 0.03 ± 0.00                | 0.02 ± 0.01 <sup>B,C</sup>   |
| Eicosenoic acid                  | C20:1n9   | 0.58 ± 0.04   | 0.57 ± 0.02              | 0.45 ± 0.02 <sup>A</sup>   | 0.46 ± 0.03 <sup>C</sup>     |
| Eicosadienoic acid (n-6)         | C20:2n6   | 0.33 ± 0.01   | 0.30 ± 0.01 <sup>A</sup> | 0.24 ± 0.01 <sup>A</sup>   | 0.25 ± 0.01 <sup>C</sup>     |
| Eicosatrienoic acid (n-6)        | C20:3n6   | 0.75 ± 0.08   | 0.80 ± 0.02              | 0.56 ± 0.01 <sup>A</sup>   | 0.54 ± 0.01 <sup>C</sup>     |
| Arachidonic acid (AA, n-6)       | C20:4n6   | 10.2 ± 0.15   | 10.6 ± 0.15              | 3.85 ± 0.08 <sup>A</sup>   | 3.83 ± 0.16 <sup>C</sup>     |
| Eicosapentaenoic acid (EPA, n-3) | C20:5n3   | 0.01 ± 0.00   | 0.01 ± 0.00              | 0.49 ± 0.02 <sup>A</sup>   | 0.47 ± 0.03 <sup>C</sup>     |
| Docosatetraenoic acid (n-6)      | C22:4n6   | 1.18 ± 0.09   | 1.21 ± 0.03              | 0.13 ± 0.01 <sup>A</sup>   | 0.13 ± 0.00 <sup>C</sup>     |
| Docosapentaenoic acid (n-3)      | C22:5n3   | 0.60 ± 0.04   | 0.55 ± 0.07              | 2.38 ± 0.04 <sup>A</sup>   | 2.37 ± 0.06 <sup>C</sup>     |
| Docosapentaenoic acid (n-6)      | C22:5n6   | 9.84 ± 1.05   | 12.3 ± 0.25 <sup>A</sup> | 0.42 ± 0.01 <sup>A</sup>   | 0.41 ± 0.01 <sup>C</sup>     |
| Docosahexaenoic acid (DHA, n-3)  | C22:6n3   | 15.5 ± 0.94   | 12.3 ± 0.59 <sup>A</sup> | 37.5 ± 0.61 <sup>A</sup>   | 36.0 ± 0.59 <sup>C</sup>     |
| Lignoceric acid                  | C24:0     | 0.04 ± 0.00   | 0.04 ± 0.00              | 0.04 ± 0.00                | 0.06 ± 0.00 <sup>B,C</sup>   |
| Nervonic acid                    | C24:1n9   | 0.06 ± 0.00   | 0.07 ± 0.00              | 0.07 ± 0.01                | 0.11 ± 0.01 <sup>B,C</sup>   |
| <b>Composite Indices</b>         |           |               |                          |                            |                              |
| Omega-3 Content (DHA+EPA)        |           | 15.5 ± 0.94   | 12.3 ± 0.59 <sup>A</sup> | 37.9 ± 0.60 <sup>A</sup>   | 36.5 ± 0.59 <sup>C</sup>     |
| Total Saturated                  |           | 30.4 ± 0.41   | 31.0 ± 0.20              | 31.3 ± 0.16 <sup>A</sup>   | 31.4 ± 0.17                  |
| Total Monounsaturated            |           | 1.33 ± 0.08   | 1.39 ± 0.04              | 1.36 ± 0.07                | 1.42 ± 0.07                  |
| n-3 Polyunsaturated              |           | 16.2 ± 0.96   | 12.9 ± 0.66 <sup>A</sup> | 40.3 ± 0.58 <sup>A</sup>   | 38.9 ± 0.64 <sup>C</sup>     |
| n-6 Polyunsaturated              |           | 39.8 ± 0.67   | 41.9 ± 0.36 <sup>A</sup> | 17.0 ± 0.16 <sup>A</sup>   | 17.6 ± 0.48 <sup>C</sup>     |
| n-3 : n-6                        |           | 0.408 ± 0.030 | 0.309 ± 0.018            | 2.371 ± 0.040 <sup>A</sup> | 2.227 ± 0.092 <sup>C</sup>   |
| EPA : AA                         |           | 0.001 ± 0.000 | 0.001 ± 0.000            | 0.124 ± 0.006 <sup>A</sup> | 0.125 ± 0.010 <sup>C</sup>   |
| EPA : DHA                        |           | 0.000 ± 0.000 | 0.001 ± 0.000            | 0.013 ± 0.001 <sup>A</sup> | 0.013 ± 0.001 <sup>C</sup>   |

<sup>A</sup>  $P < 0.05$  versus Control diet/sham; <sup>B</sup>  $P < 0.05$  versus Fish oil diet/sham; <sup>C</sup>  $P < 0.05$  versus Control diet/TAC. All measurements are means ± SEM, and significance was determined using the two-way ANOVA with post tukey test.

<sup>a</sup> Reported as percent of total fatty acid.

<sup>b</sup> Most common name given. Omega-9, omega-6 and omega-3 FAs are indicated as n9, n6, and n3, respectively

**Supplemental Table 3: Echocardiographic and hemodynamic assessment of cardiac structure and function after 4 weeks of TAC.**

|                         | Control diet  |                          | Fish oil diet |                            |
|-------------------------|---------------|--------------------------|---------------|----------------------------|
|                         | Sham          | TAC                      | Sham          | TAC                        |
|                         | n=6           | n=9                      | n=6           | n=9                        |
| BW (g)                  | 26 ± 0.5      | 27 ± 0.5                 | 26 ± 0.5      | 26 ± 0.4                   |
| HW (mg)                 | 133 ± 7       | 197 ± 12 <sup>A</sup>    | 118 ± 2       | 160 ± 10 <sup>B,C</sup>    |
| HW/BW (mg/g)            | 5.1 ± 0.2     | 7.3 ± 0.4 <sup>A</sup>   | 4.5 ± 0.1     | 6.0 ± 0.3 <sup>B,C</sup>   |
| <b>Echocardiography</b> | <b>n=6</b>    | <b>n=9</b>               | <b>n=6</b>    | <b>n=9</b>                 |
| HR                      | 610 ± 19      | 608 ± 22                 | 640 ± 9       | 641 ± 10                   |
| IVSth (mm)              | 0.87 ± 0.03   | 1.21 ± 0.04 <sup>A</sup> | 0.88 ± 0.02   | 1.11 ± 0.05 <sup>B</sup>   |
| LVPWth (mm)             | 0.86 ± 0.01   | 1.27 ± 0.06 <sup>A</sup> | 0.86 ± 0.01   | 1.05 ± 0.03 <sup>B,C</sup> |
| LVEDD (mm)              | 3.37 ± 0.08   | 3.79 ± 0.19 <sup>A</sup> | 3.31 ± 0.06   | 3.66 ± 0.09                |
| LVESD (mm)              | 1.87 ± 0.11   | 2.76 ± 0.28 <sup>A</sup> | 1.62 ± 0.12   | 2.01 ± 0.11 <sup>C</sup>   |
| FS(%)                   | 45 ± 2        | 28 ± 4 <sup>A</sup>      | 51 ± 3        | 45 ± 3 <sup>C</sup>        |
| <b>Hemodynamics</b>     | <b>n=6</b>    | <b>n=8</b>               | <b>n=6</b>    | <b>n=8</b>                 |
| ESP (mmHg)              | 110 ± 2       | 186 ± 7 <sup>A</sup>     | 118 ± 6       | 206 ± 9 <sup>B</sup>       |
| EDP (mmHg)              | 1.8 ± 1.6     | 13.4 ± 3.5 <sup>A</sup>  | 2.0 ± 0.7     | 2.5 ± 0.9 <sup>C</sup>     |
| dP/dT max (mmHg/sec)    | 11979 ± 753   | 8485 ± 538 <sup>A</sup>  | 11450 ± 897   | 12144 ± 631 <sup>C</sup>   |
| dP/dT min (mmHg/sec)    | -11380 ± 1101 | -8340 ± 549 <sup>A</sup> | -11038 ± 764  | -11088 ± 654 <sup>C</sup>  |
| Tau_w                   | 3.9 ± 0.9     | 8.5 ± 1.6 <sup>A</sup>   | 7.0 ± 1.9     | 4.2 ± 0.9 <sup>C</sup>     |
| PG(mmHg)                |               | 67.2 ± 8.8               |               | 76.4 ± 12.0                |

<sup>A</sup> $P < 0.05$  versus Control diet/sham; <sup>B</sup> $P < 0.05$  versus Fish oil diet/sham; <sup>C</sup> $P < 0.05$  versus Control diet/TAC. All measurements are means ± SEM, and significance was determined using the two-way ANOVA with post tukey test. BW, body weight; HW, heart weight; IVSth, intraventricular septal thickness; LVPWth, left ventricular posterior wall thickness; LVEDD, left ventricular end-diastolic dimension; LVESD, left ventricular end-systolic dimension; FS, fractional shortening; HR, heart rate; ESP, end-systolic pressure; EDP, end-diastolic pressure; PG, pressure gradient.

**Supplemental figure 1**EPA and DHA reduce the TGF- $\beta$ 1-induced Smad-responsive promoter activity**A**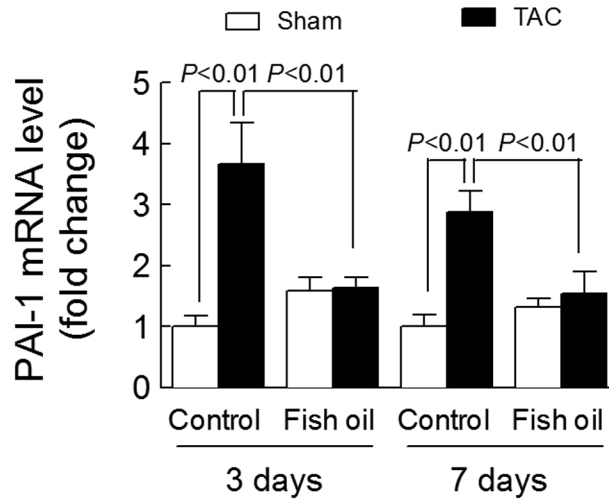**B**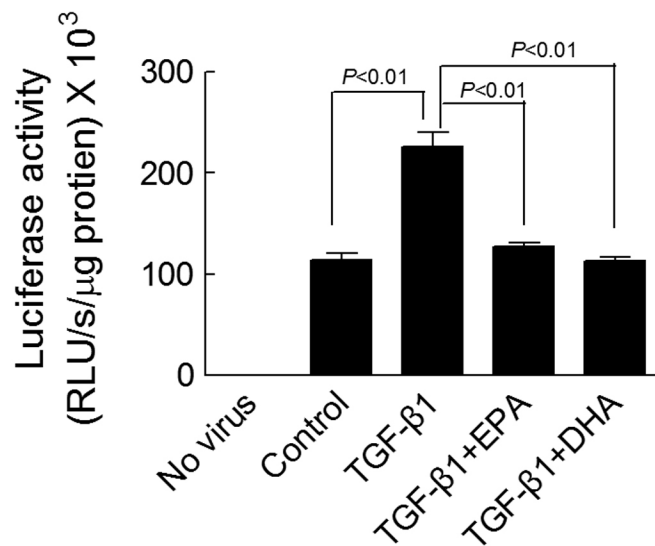

### Supplemental Figure 2.

Proposed anti-fibrotic mechanism of  $\omega$ -3 PUFAs in cardiac fibroblast

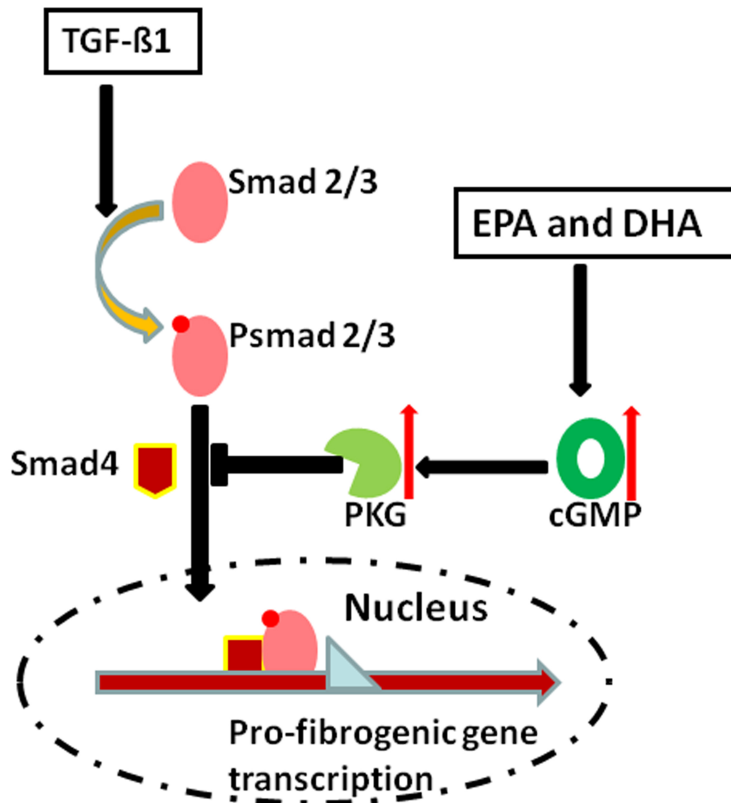

**Supplemental Figure 3.**

EPA and DHA do not block TGF- $\beta$ 1-induced activation of ERK1/2

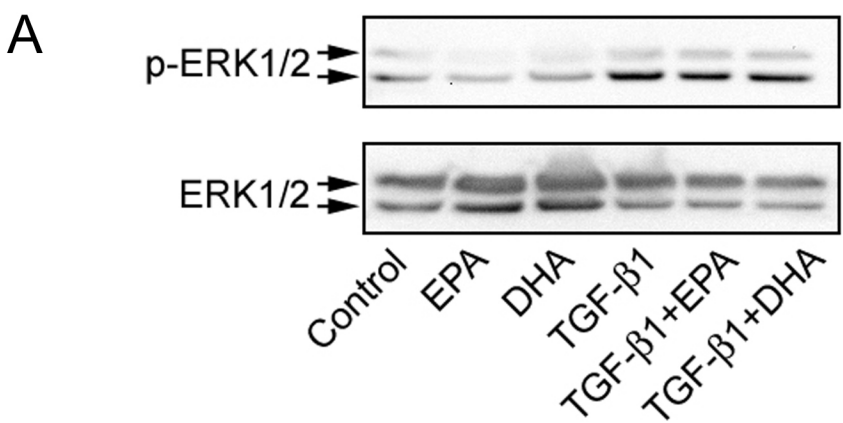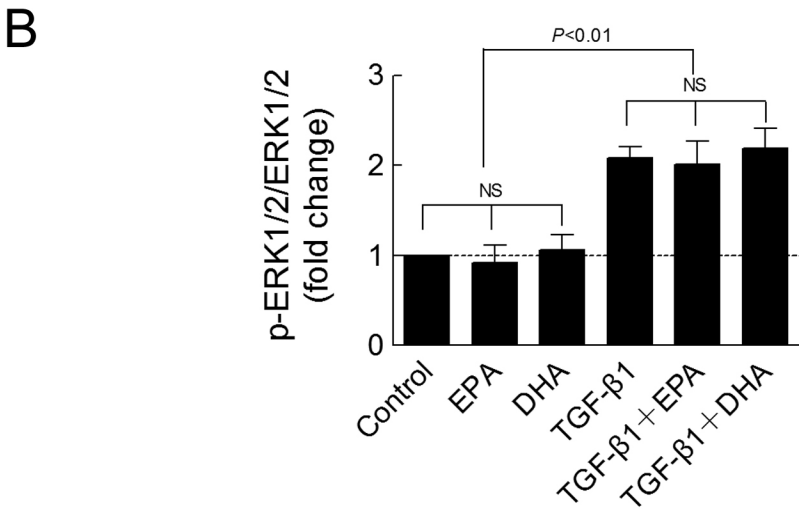

Supplement: NIHMS267193-supplement-supplement_1.pdf [file NIHMS267193-supplement-supplement_1.pdf]
